# Supplementary material
Source: Research Square preprint supplement (doi:10.21203/rs.3.rs-9821973/v1)
Supplement: Supplementary file 1 [file c93d4d167baf05af1be792d5.docx]

Table S1 Occurrence of OAB-related symptoms in different compartments and severity of POP

|  | | **Frequency** | **Nocturia** | **Urgency** | **UUI** | **OAB** |
| --- | --- | --- | --- | --- | --- | --- |
| **AVWP** | Stage 0  n=3 | 1  (0.18%) | 0  (0.00%) | 0  (0.00%) | 0  (0.00%) | 0  (0.00%) |
| Stage Ⅰ  n=12 | 4  (0.73%) | 9  (1.64%) | 5  (0.91%) | 0  (0.00%) | 7  (1.27%) |
| Stage Ⅱ  n=125 | 29  (5.27%) | 48  (8.73%) | 30  (5.45%) | 5  (0.91%) | 22  (4.00%) |
| Stage Ⅲ  n=341 | 92  (16.73%) | 147  (26.73%) | 104  (18.91%) | 22  (4.00%) | 78  (14.18%) |
| Stage Ⅳ  n=69 | 26  (4.73%) | 37  (6.73%) | 28  (5.09%) | 10  (1.82%) | 17  (3.09%) |
| **AP** | Stage 0  n=17 | 2  (0.36%) | 4  (0.73%) | 5  (0.91%) | 0  (0.00%) | 5  (0.91%) |
| Stage Ⅰ  n=83 | 32  (5.82%) | 41  (7.45%) | 30  (5.45%) | 4  (0.73%) | 18  (3.27%) |
| Stage Ⅱ  n=134 | 32  (5.82%) | 61  (11.09%) | 34  (6.18%) | 5  (0.91%) | 24  (4.36%) |
| Stage Ⅲ  n=249 | 61  (11.09%) | 98  (17.82%) | 68  (12.36%) | 16  (2.91%) | 58  (10.55%) |
| Stage Ⅳ  n=67 | 25  (4.55%) | 37  (6.73%) | 30  (5.45%) | 12  (2.18%) | 19  (3.45%) |
| **PVWP** | Stage 0  n=5 | 2  (0.36%) | 3  (0.55%) | 2  (0.36%) | 0  (0.00%) | 2  (0.36%) |
| Stage Ⅰ  n=70 | 21  (3.82%) | 29  (5.27%) | 23  (4.18%) | 3  (0.55%) | 18  (3.27%) |
| Stage Ⅱ  n=288 | 75  (13.64%) | 123  (22.36%) | 76  (13.82%) | 19  (3.45%) | 56  (10.18%) |
| Stage Ⅲ  n=162 | 45  (8.18%) | 72  (13.09%) | 55  (10.00%) | 12  (2.18%) | 41  (7.45%) |
| Stage Ⅳ  n=25 | 9  (1.64%) | 14  (2.55%) | 11  (2.00%) | 3  (0.55%) | 7  (1.27%) |
| **Total** | | 152 | 241 | 167 | 37 | 124 |

OAB, overactive bladder; POP, pelvic organ prolapse; AVWP, anterior vaginal wall prolapse; AP, apical prolapse; PVWP, posterior vaginal wall prolapse; UUI, urge urinary incontinence

Categorical variables were presented as number (percentage).
